# Supplementary material
Source: PubMed Central journal article supplement (PMC3581031)
Supplement: Supp_Fig1.pdf [file Supp_Fig1.pdf]

## Supplementary Data

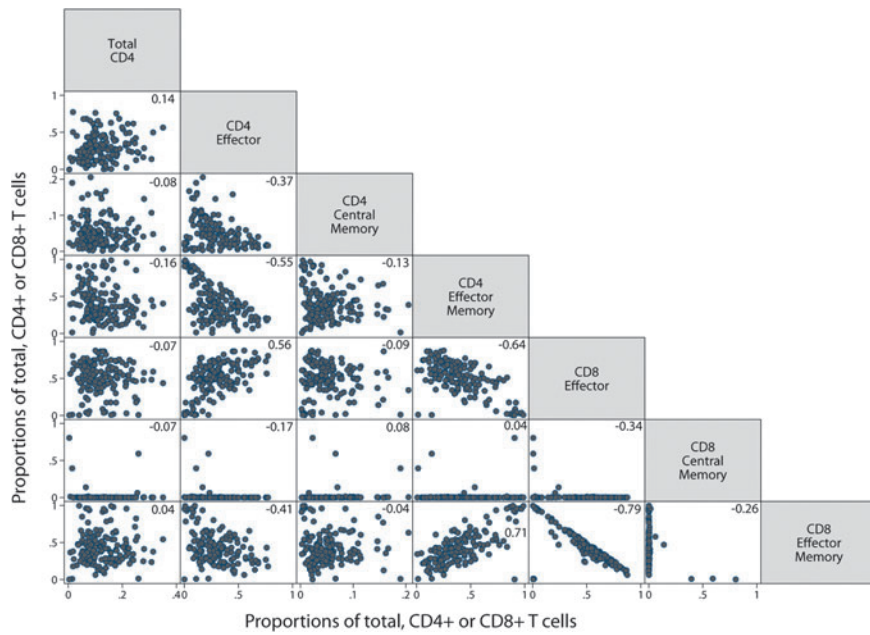

**SUPPLEMENTARY FIG. S1.** Correlations between T cell subsets among HIV-infected Zambian children beginning highly active antiretroviral therapy. Numbers in top right corners indicate Pearson's correlation coefficients ( $\rho$ ). Total CD4<sup>+</sup> T cells were defined as the percentage of CD4<sup>+</sup> T cells among CD3<sup>+</sup> lymphocytes.
